# Supplementary material
Source: PubMed Central journal article supplement (PMC10552917)
Supplement: NIHMS1926733-supplement-1.pdf [file NIHMS1926733-supplement-1.pdf]

**Figure S1: RA enhances Treg cell conversion independently of nuclear RAR $\alpha$**   
 (Related to Figure 1)

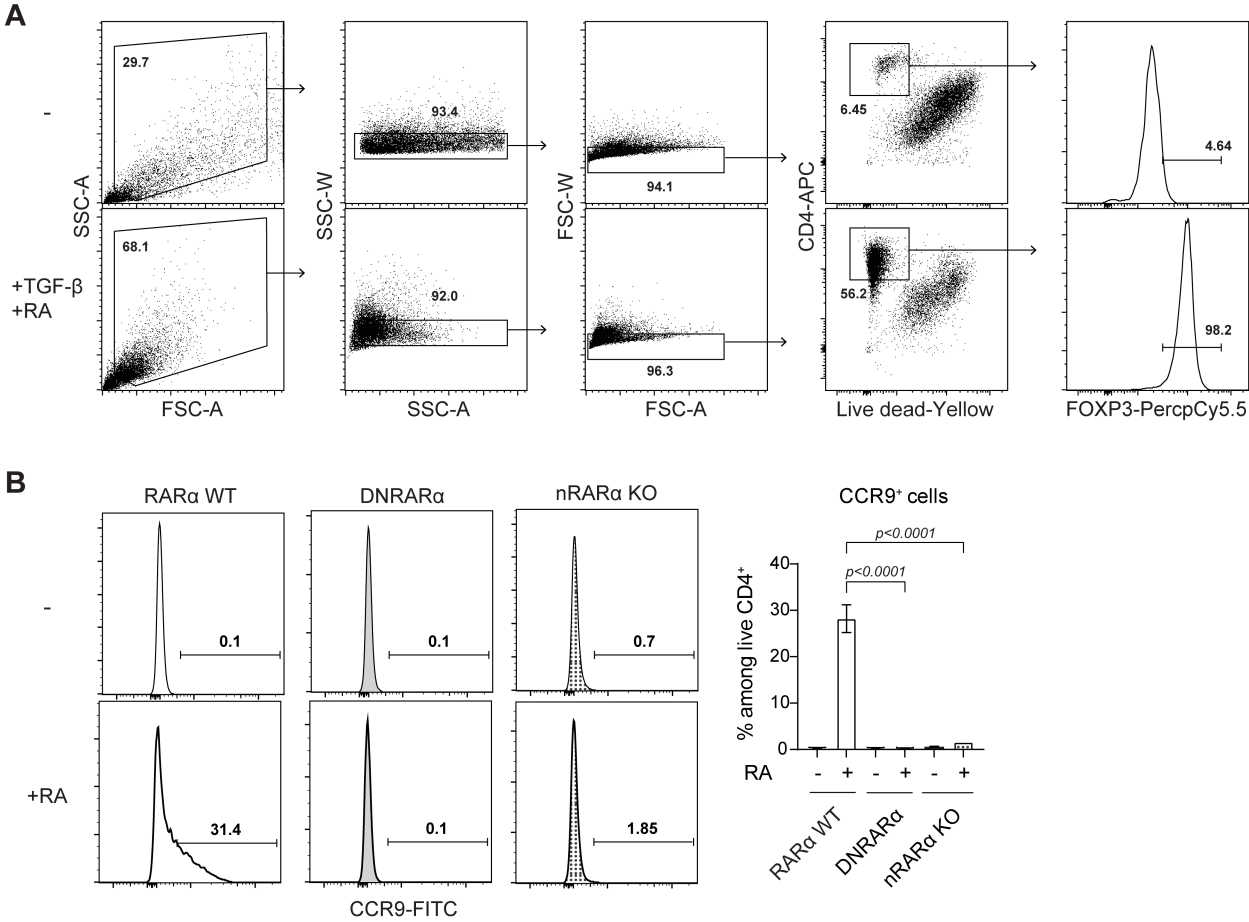

**Figure S2: T cells express an extranuclear isoform of RAR $\alpha$**   
(Related to Figure 2)

**A**

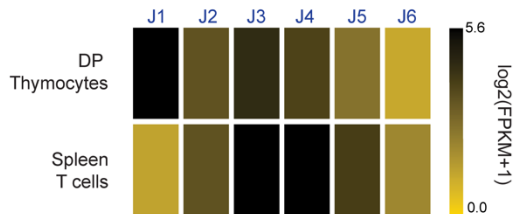

**C**

**Exon4**  
ATTTGCCGTGTCGGGGCCTCCCGAGAAGGAAGTGGAG

**Exon5**  
ATTTGCCGTGTCGGGGCCTCCCGAGAAGGAAGTGGAGTAAAACTGGGGCA  
GGGCAGTTGTGTAGGCATGAGCAGCAGATTGCAGCAGGTCACTCCTTTG  
GACCCTGGGGTGTAGGCATGAAAAGTCTTTCCATGGGTTAAAGAA  
GGGAACATGGGTTACAGCAACGTTGACAGCCCGGCTGATGCCAGGCC  
AAGTAGAAGCCAGGAAAGTCTGCCAAGGCCATTGGCGGAGTTCCTGGT  
GTGTTTGCA

**Exon6**  
**CCGCAGGAGTCTTTACAGCCTGGCATAACACATGCTGTTGGATGCTTGG**  
**CACAGGAACCGTGATATCCAGCACTCAACTGG**

**Exon7**  
ATTTGCCGTGTCGGGGCCTCCCGAGAAGGAAGTGGAGTAAAACTGGGGCA  
GGGCAGTTGTGTAGGCATGAGCAGCAGATTGCAGCAGGTCACTCCTTTG  
GACCCTGGGGTGTAGGCATGAAAAGTCTTTCCATGGGTTAAAGAA  
GGGAACATGGGTTACAGCAACGTTGACAGCCCGGCTGATGCCAGGCC  
AAGTAGAAGCCAGGAAAGTCTGCCAAGGCCATTGGCGGAGTTCCTGGT  
GTGTTTGCA

**Exon8**  
ATTTGCCGTGTCGGGGCCTCCCGAGAAGGAAGTGGAGTAAAACTGGGGC  
AGGCAGTTGTGTAGGCATGAGCAGCAGATTGCAGCAGGTCACTCCTTT  
GGACCCTGGGGTGTAGGCATGAAAAGTCTTTCCATGGGTTAAAG  
AAGGAAACATGGGTTACAGCAACGTTGACAGCCCGGCTGATGCCAGGC  
CAAAGTAGAAGCCAGGAAAGTCTGCCAAGGCCATTGGCGGAGTTCCTG  
GTGTTTGCAAGGTAGGAGGTTGATGATGCAACCAAGCCCTGCTGGTCCC  
CAAGTGTCTAACCTCTGCTGGGCTTTGACAGCCGAGGAGTCTTCC  
**AGCCTGGCATAACACATGCTGTTGGATGCTTGACACAGGAACCGTGATAT**  
**CCAGCACTCAACTGG**

**Exon8.1**  
ATTTGCCGTGTCGGGGCCTCCCGAGAAGGAAGTGGAGTAAAACTGGGGC  
AGGCAGTTGTGTAGGCATGAGCAGCAGATTGCAGCAGGTCACTCCTTT  
GGACCCTGGGGTGTAGGCATGAAAAGTCTTTCCATGGGTTAAAG  
AAGGAAACATGGGTTACAGCAACGTTGACAGCCCGGCTGATGCCAGGC  
CAAAGTAGAAGCCAGGAAAGTCTGCCAAGGCCATTGGCGGAGTTCCTG  
GTGTTTGCAAGGTAGGAGGTTGATGATGCAACCAAGCCCTGCTGGTCCC  
CAAGTGTCTAACCTCTGCTGGGCTTTGACAGCCGAGGAGTCTTCC  
**AGCCTGGCATAACACATGCTGTTGGATGCTTGACACAGGAACCGTGATAT**  
**CCAGCACTCAACTGG**

**B**

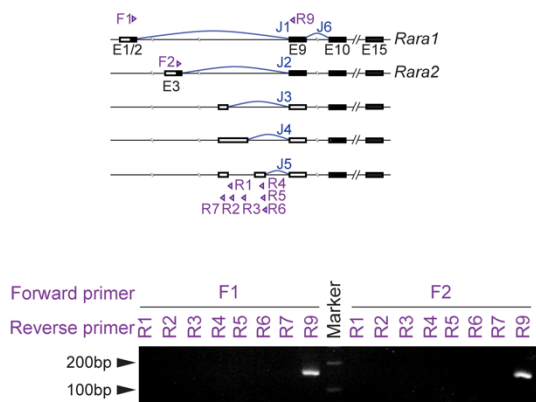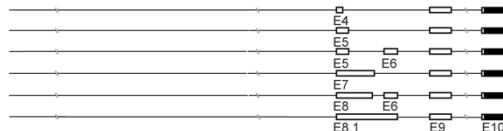

**D**

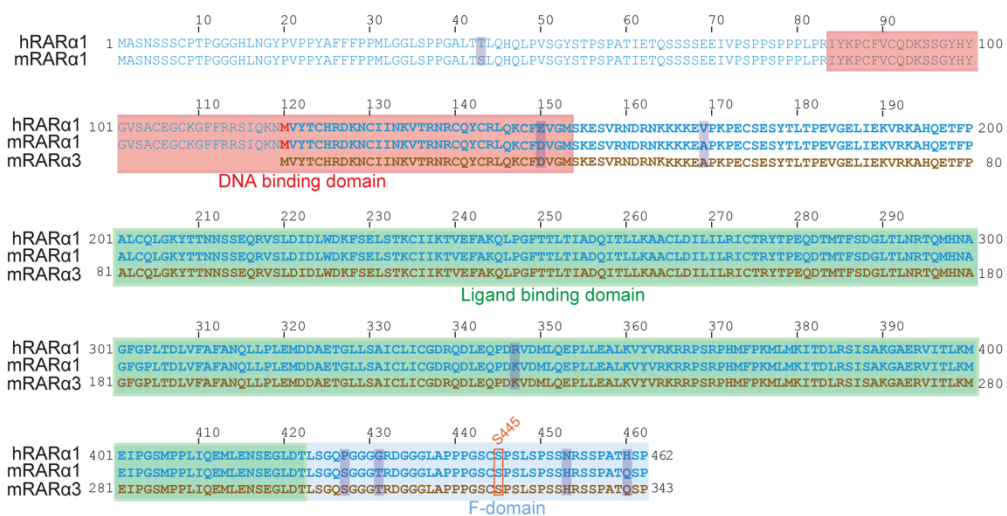

**Figure S3: Extranuclear RAR $\alpha$  controls TCR signal transduction (Related to Figure 3)**

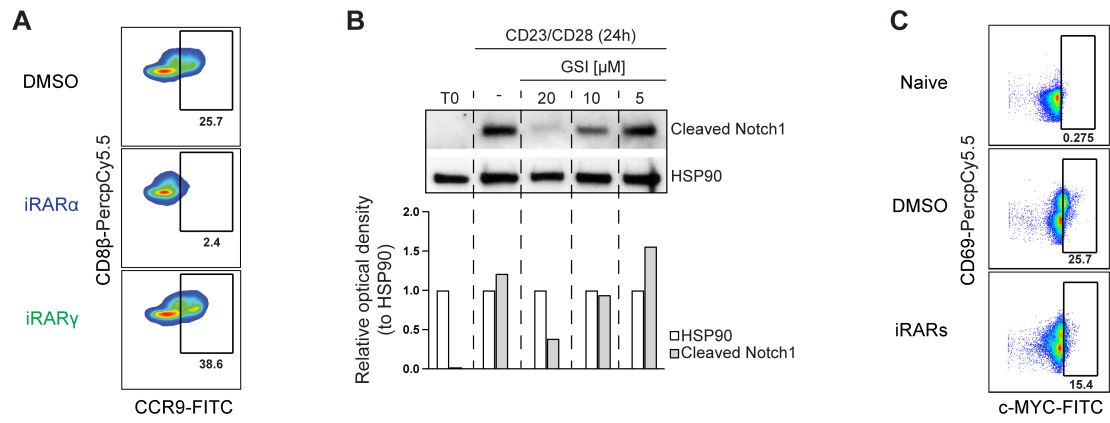

**Figure S4: RA counteracts extranuclear RAR $\alpha$  signaling in T cells (Related to Figure 5)**

**A**

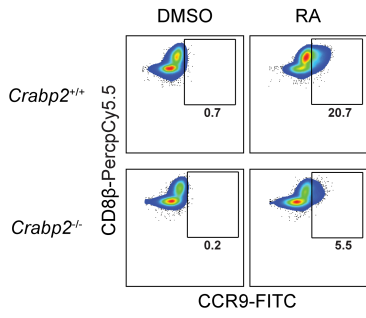

**B**

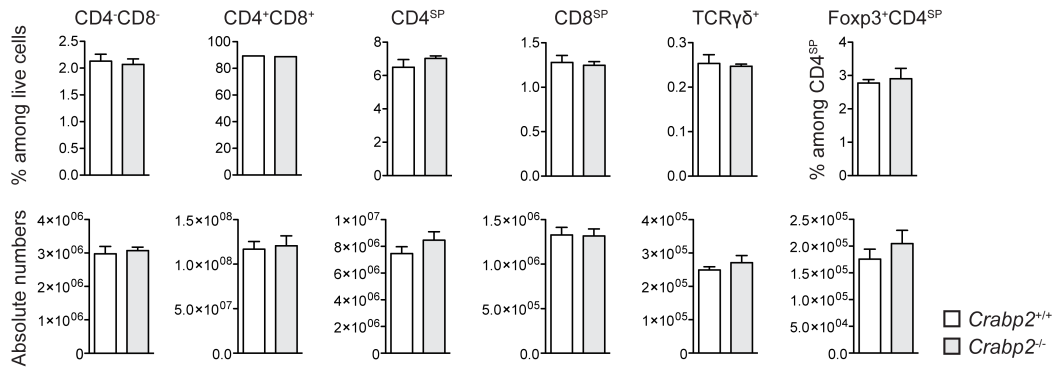

**Figure S5: Extranuclear RAR $\alpha$  signaling controls TCR-induced proliferation *in vivo* (Related to Figure 6)**

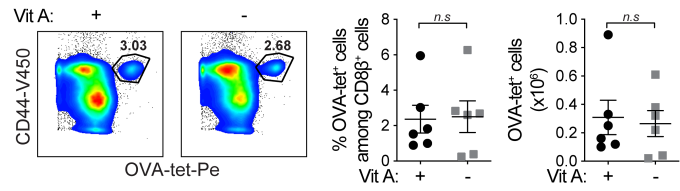

**Figure S6: Extranuclear RAR $\alpha$  signaling controls effector differentiation *in vivo***  
(Related to Figure 7)

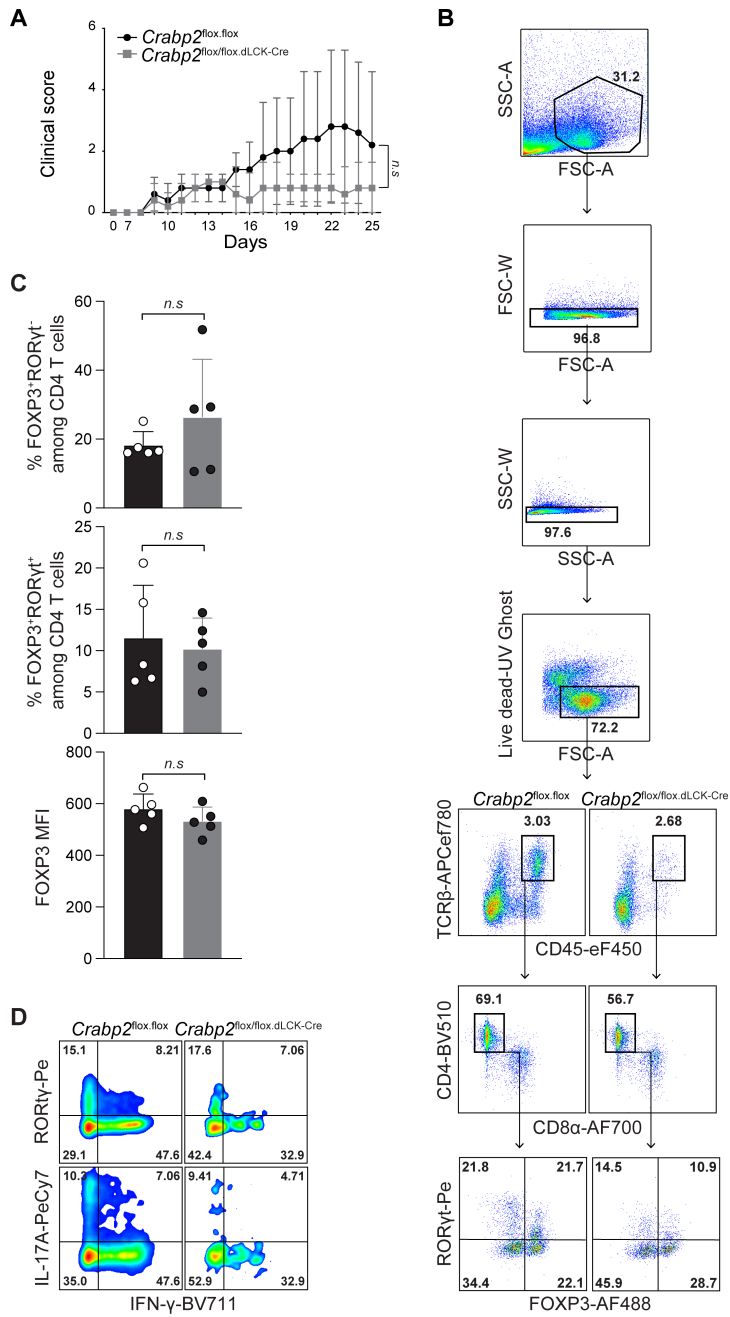

## SUPPLEMENTAL FIGURE LEGENDS

### **FIGURE S1: RA enhances Treg cell conversion independently of nuclear RAR $\alpha$** **(Related to Figure 1)**

**(A)** Gating strategy for analysis of FOXP3 expression among WT CD4 T cells stimulated for 96hrs with  $\alpha$ -CD3/CD28 with or without TGF- $\beta$  or RA. **(B)** Cell surface expression for CCR9 on WT, DNRAR $\alpha$  or nRAR $\alpha$ -deficient naïve spleen CD4 T cells stimulated for 16hrs *in vitro* with 1.0  $\mu$ g/ml of plate-bound  $\alpha$ -CD3 and 0.5  $\mu$ g/ml of  $\alpha$ -CD28, then cells were washed and cultured 48 more hours (64hrs in total) in cRPMI supplemented with 25 ng/ml of IL-2 with or without RA (10nM). Representative histograms of 2 independent experiments are shown. Statistical analyses of frequency of CCR9<sup>+</sup> T cells on the right was calculated with the two-tailed Student t-test. Mean +/- SEM is depicted.

### **FIGURE S2: T cells express an extranuclear isoform of RAR $\alpha$** (Related to Figure 2)

**(A)** Heatmap for junction-use in spleen and DP thymocytes calculated and drawn by SG-seq package on R. **(B)** PCR analysis performed on cDNA from DP thymocytes using forward primers F1 and F2 in combination with reverse R primers as shown. F1+R9 and F2+R9 detect *Rara1* and *Rara2*, respectively. **(C)** DNA sequences of new exons as indicated. Shared sequence between exons 6 and 8.1 is in red. **(D)** Amino acid sequences of human and mouse RAR $\alpha$ 1 and mouse RAR $\alpha$ 3 are aligned. Lighter colored amino acids indicate mismatches between human and mouse. The first methionine used by mRAR $\alpha$ 3 is in red in the sequence of hRAR $\alpha$ 1 and mRAR $\alpha$ 1. The amino acid sequences shared by hRAR $\alpha$ 1 or mRAR $\alpha$ 1 and mRAR $\alpha$ 3 are in bold. Sequence encoding the DNA Binding

Domain (brown), the Ligand Binding Domain (green) and the F Domain (blue) are indicated. The numbers indicate amino acid number. Serine (S445) in the F Domain phosphorylated upon TCR stimulation is marked.

**FIGURE S3: Extranuclear RAR $\alpha$  controls TCR signal transduction (Related to Figure 3)**

(A) Primary spleen T cells were treated with DMSO, a pan-RAR antagonist LE540 (iRARs), an RAR $\alpha$ -specific antagonist, Ro 41-5253 (iRAR $\alpha$ ) or an RAR $\gamma$  antagonist, MM11253 (iRAR $\gamma$ ) and activated with anti-CD3/CD28 in the presence of (10nM) RA for 72hrs. CCR9 expression was then assessed. Dot plots are from a representative experiment. Graphs represent the means  $\pm$  SEM of CCR9 $^+$  T cells from 3 independent experiments. (B) Primary spleen T cells unstimulated or activated for 24hrs with anti-CD3/CD28 alone or with  $\gamma$ -secretase inhibitor (GSI) were analyzed with western blot for cleaved NOTCH1-intracellular domain with the quantification of its optical density relative to control HSP90. Representative western blot from 2 independent experiments. (C) Primary spleen T cells treated with DMSO or iRARs and activated with anti-CD3/CD28 for 4hrs were analyzed for the expression of c-MYC protein. Dot plots are from a representative experiment from three independent experiments.

**FIGURE S4: RA counteracts extranuclear RAR $\alpha$  signaling in T cells (Related to Figure 5)**

(A) WT or CRABP2-deficient spleen T cells were activated with  $\alpha$ -CD3/CD28 in the presence of RA (10nM) for 72hrs. CCR9 expression was then assessed. Dot plots show



one representative experiment out of three independent experiments. **(B)** Thymocytes isolated from 5 (10week-old and gender matched) WT and CRABP2-deficient mice were analyzed for phenotype, frequency and absolute number. Data are represented as the means +/- SEM.

**FIGURE S5: Extranuclear RAR $\alpha$  signaling controls TCR-induced proliferation *in vivo* (Related to Figure 6)**

Tracking of endogenous OVA-reactive CD8 T cells in the spleen of WT CD45.1<sup>+</sup>CD45.2<sup>+</sup> recipient mice with Vitamin A or Vitamin A-free, infected i.v. with ActA<sup>-</sup> Lm-OVA and assessed 7 days later. Graphs show the percentage and absolute number of OVA-reactive CD8 T cells among the total CD8 T cells.

**FIGURE S6: Extranuclear RAR $\alpha$  signaling controls effector differentiation *in vivo* (Related to Figure 7)**

EAE was induced in WT and *Crabp2* conditional deletion mutant mice and cells from spinal cords were analyzed by FACs at day25 of EAE induction. **(A)** Clinical scores were assessed daily. **(B)** Gating strategy for live TCR $\beta$  and CD45 positive cells with a representative dot plot for FOXP3 and ROR $\gamma$ t expressions. **(C)** Quantifications of FOXP3<sup>+</sup>ROR $\gamma$ t<sup>-</sup> Treg and FOXP3<sup>+</sup>ROR $\gamma$ t<sup>+</sup> cell frequencies and FOXP3 mean fluorescence intensity (MFI) among CD4 T cells. **(D)** Frequency of IFN $\gamma$ <sup>+</sup> and ROR $\gamma$ t<sup>+</sup> (upper) or IL17A<sup>+</sup>(lower) cells are shown in representative dot plots. Data are representative of 2 independent EAE experiments. Statistical significance calculated with two-tailed Student t-test. Shown mean +/- SD.
